# Supplementary material for: A new structure family of oxide-ion conductors Ca0.8Y2.4Sn0.8O6 discovered by a combined technique of the bond-valence method and experiments
Source: Royal Society of Chemistry journal article supplement (doi:10.1039/c8dt01024b), 2018-01-01
Supplement: c8dt01024b1.pdf [file c8dt01024b1.pdf]

## Electronic Supplementary Information (ESI)

A new structure family of oxide-ion conductors

$\text{Ca}_{0.8}\text{Y}_{2.4}\text{Sn}_{0.8}\text{O}_6$  discovered by a combined technique of  
the bond-valence method and experiments

*Ryota Inoue, Kotaro Fujii, Masahiro Shiraiwa, Eiki Niwa,*

*Masatomo Yashima\**

Department of Chemistry, School of Science, Tokyo Institute of Technology,  
2-12-1-W4-17, O-okayama, Meguro-ku, Tokyo, 152-8551

\*Corresponding Author

Masatomo Yashima  
yashima@cms.titech.ac.jp

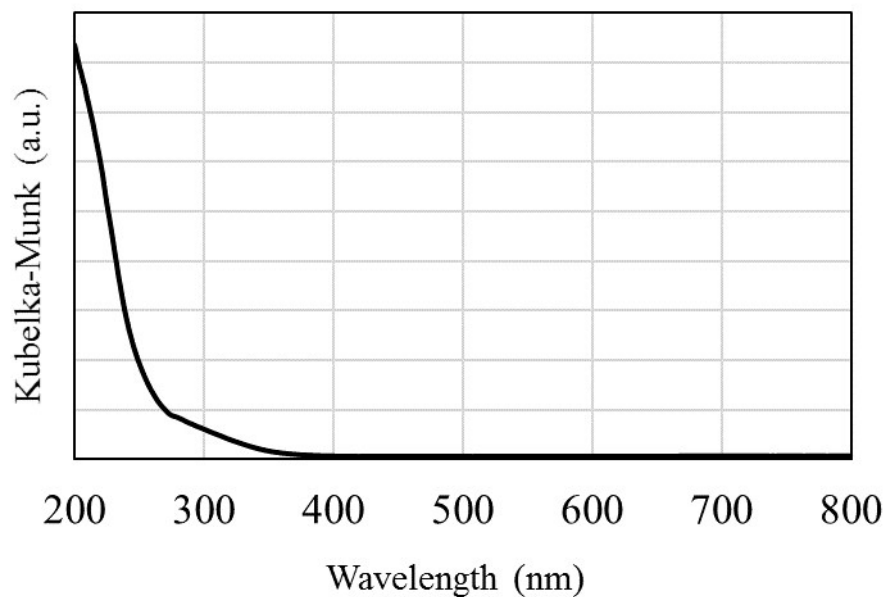

**Figure S1.** UV-vis diffuse reflectance spectrum of  $\text{Ca}_{0.8}\text{Y}_{2.4}\text{Sn}_{0.8}\text{O}_6$ .

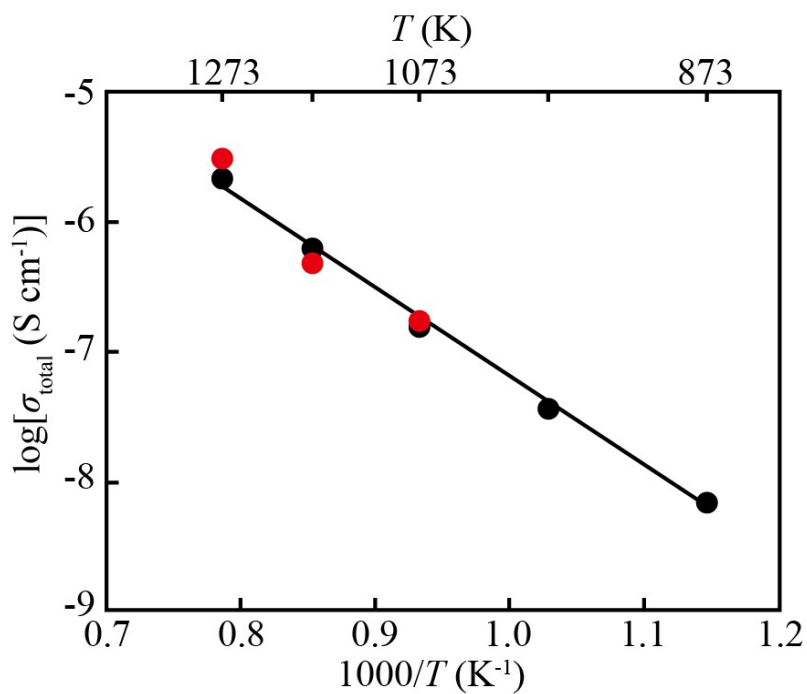

**Figure S2.** Arrhenius plots of the total electrical conductivity  $\sigma_{\text{total}}$  measured in air (black circles) and wet air (red circles) of  $\text{Ca}_{0.8}\text{Y}_{2.4}\text{Sn}_{0.8}\text{O}_6$ .

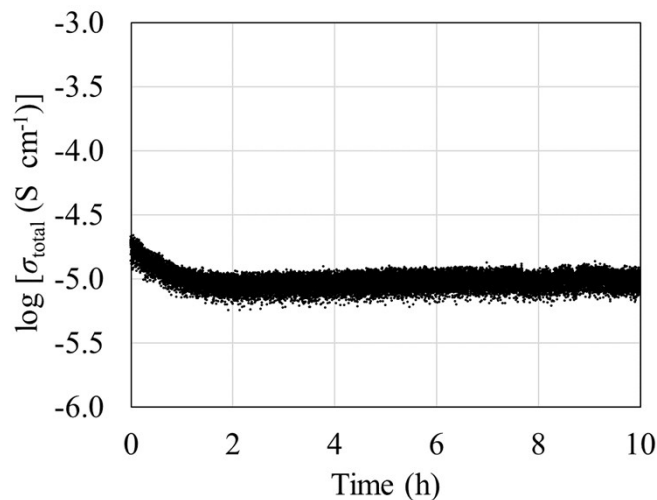

**Figure S3.** Time dependence of the electrical conductivity of  $\text{Ca}_{0.8}\text{Y}_{2.4}\text{Sn}_{0.8}\text{O}_6$  at 1273 K.

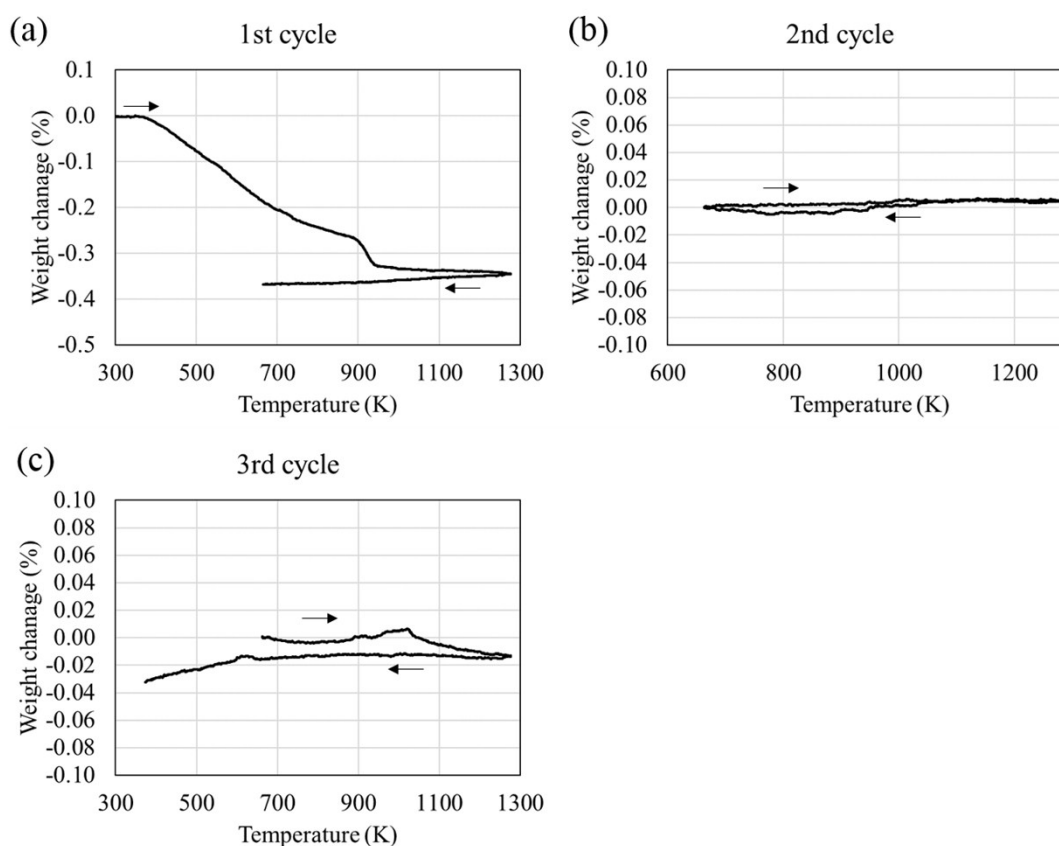

**Figure S4.** TG curves of  $\text{Ca}_{0.8}\text{Y}_{2.4}\text{Sn}_{0.8}\text{O}_6$  during (a) 1<sup>st</sup>, (b) 2<sup>nd</sup> and (c) 3<sup>rd</sup> heating/cooling processes.

End of the Electronic Supplementary Information (ESI).
